# Supplementary material for: Bioinformatics leading to conveniently accessible, helix enforcing, bicyclic ASX motif mimics (BAMMs)
Source: PubMed Central journal article supplement (PMC11101637; doi:10.1038/s41467-024-48323-z), 2024-05-17
Supplement: 41467_2024_48323_MOESM3_ESM.pdf [file 41467_2024_48323_MOESM3_ESM.pdf]

## **Description of Additional Supplementary Files**

### **Supplementary Data 1:**

(nonredundant ASX motifs):

Unique ASX motifs mined from PDB and their location, sequence, secondary structure and dihedral angle information.

### **Supplementary Data 2:**

(helical N-cap ASX motifs)

Unique ASX motifs served as helical N-caps and their location, sequence, secondary structure and dihedral angle information.

### **Supplementary Data 3:**

(hydrophobic patterns of helical N-cap ASX motifs)

Helical N-capped ASX motifs with hydrophobic residues at N' and N4, and their location, sequence, secondary structure, dihedral angle and cross-turn hydrophobic interaction information.
